# Supplementary material for: Relevance of pharmacogenetic analyses and therapeutic drug monitoring of antidepressants for an individualized treatment of peripartum psychopathology
Source: PubMed Central journal article supplement (PMC10833183; doi:10.1097/yic.0000000000000520), 2023-11-20
Supplement: icp-39-106-s001.pdf [file icp-39-106-s001.pdf]

## SUPPLEMENTARY MATERIAL

### P450 enzymes mainly involved in the metabolism of antidepressants prescribed in our sample

| <b>Antidepressant</b> | <b>CYP enzymes</b>          |
|-----------------------|-----------------------------|
| <i>Sertraline</i>     | CYP2C19<br>CYP2B6           |
| <i>Paroxetine</i>     | CYP2D6                      |
| <i>Escitalopram</i>   | CYP2C19<br>CYP2D6<br>CYP3A4 |
| <i>Citalopram</i>     | CYP2C19<br>CYP2D6<br>CYP3A4 |
| <i>Fluoxetine</i>     | CYP2D6<br>CYP2C9            |
| <i>Venlafaxine</i>    | CYP2D6                      |
| <i>Duloxetine</i>     | CYP1A2<br>CYP2D6            |

## Main socio-demographic and clinical characteristic of our sample

| Variable                       | Frequency [N(%)] | Psychiatric comorbidity               |           |
|--------------------------------|------------------|---------------------------------------|-----------|
| <b>Total sample</b>            | 87 (100)         | Yes                                   | 21 (24.1) |
| <b>Nationality</b>             |                  | <b>Organic comorbidity</b>            |           |
| Italian                        | 69 (79.3)        | Yes                                   | 13 (14.9) |
| Other                          | 18 (20.7)        | <b>Other medications</b>              |           |
| <b>Marital Status</b>          |                  | Non psychiatric                       | 22 (25.3) |
| Married                        | 37 (42.5)        | Benzodiazepines                       | 11 (12.6) |
| Unmarried                      | 39 (44.8)        | S-adenosylmethionine infusive therapy | 5 (5.7)   |
| Single                         | 3 (3.5)          | <b>Active tobacco use</b>             |           |
| Unknown                        | 8 (9.2)          | Yes                                   | 11 (12.6) |
| <b>Education</b>               |                  | <b>Active alcohol use</b>             |           |
| Primary School                 | 0 (0)            | Yes                                   | 1 (1.2)   |
| Secondary School               | 10 (11.5)        | <b>Current antidepressant</b>         |           |
| High School                    | 33 (37.9)        | Sertraline                            | 43 (49.5) |
| University                     | 28 (32.2)        | Paroxetine                            | 13 (14.9) |
| Unknown                        | 16 (18.4)        | Escitalopram                          | 11 (12.6) |
| <b>Occupation</b>              |                  | Citalopram                            | 3 (3.5)   |
| Employed                       | 35 (40.2)        | Fluoxetine                            | 4 (4.6)   |
| Unemployed                     | 8 (9.2)          | Venlafaxine                           | 11 (12.6) |
| Unknown                        | 44 (50.6)        | Duloxetine                            | 2 (2.3)   |
| <b>Diagnosis</b>               |                  | <b>Metabolic profile</b>              |           |
| Major depressive disorder      | 39 (44.8)        | Poor                                  | 5 (7)     |
| Anxiety disorder               | 36 (41.4)        | Intermediate                          | 17 (24)   |
| Obsessive-compulsive disorder  | 7 (8.0)          | Extensive                             | 39 (61,9) |
| Bipolar disorder type II       | 4 (4.6)          | Ultra rapid                           | 10 (7,1)  |
| Post-traumatic stress disorder | 1 (1.2)          | Missing                               | 16        |
